# Supplementary material for: Effect of the COVID-19 pandemic and international travel ban on elephant tourist camp management in northern Thailand
Source: Frontiers journal article supplement (doi:10.3389/fvets.2022.1038855), 2022-12-02
Supplement: Data_Sheet_2.xlsx [file Data_Sheet_2.xlsx]

## Sheet: Visitor
Camp No.	T00	T01	T02	T03	T04	T05	T06
1	200	0	0	0	0	2	6
2	600	4	4	4	0	2	10
3	600	4	4	4	0	4	10
4	300	2	2	2	0	2	6
5	40	0	0	0	0	2	2
6	10	2	0	0	0	2	2
7	15	0	0	0	0	4	7
8	10	0	0	0	0	2	2
9	10	2	2	2	2	4	8
10	400	2	2	2	2	4	4
11	15	0	0	0	0	0	2
12	10	0	0	0	0	0	2
13	50	0	0	0	0	3	10
14	20	0	0	0	0	0	2
15	200	0	0	0	0	2	4
16	10	0	NA	NA	NA	NA	NA
17	50	4	4	4	4	10	10
18	50	NA	2	2	2	2	4
19	30	0	0	0	0	2	2
20	60	15	15	15	15	15	15
21	30	0	0	0	0	2	6
22	15	0	0	0	0	2	4
23	40	2	2	2	2	10	15
24	20	0	0	0	0	2	4
25	12	0	0	0	0	NA	NA
26	8	NA	NA	NA	NA	2	10
27	100	NA	2	2	2	4	10
28	30	0	0	0	0	2	10
29	10	0	2	2	2	2	10
30	50	10	20	20	20	30	30

## Sheet: Elephant
Camp No.	T00	T01	T02	T03	T04	T05	T06
1	43	45	45	46	54	52	48
2	54	53	52	50	49	49	46
3	12	10	10	8	7	7	5
4	67	67	65	63	59	54	40
5	6	6	6	6	5	5	5
6	19	17	13	13	13	13	13
7	3	3	3	3	3	3	3
8	2	2	2	2	2	2	2
9	8	8	8	10	10	10	10
10	59	57	57	55	55	55	55
11	11	8	8	8	8	8	8
12	8	8	8	7	7	7	7
13	12	12	10	10	11	11	11
14	6	6	6	6	6	6	6
15	8	1	1	1	1	1	1
16	10	3	NA	NA	0	0	0
17	12	10	9	7	7	7	7
18	4	NA	9	6	6	6	6
19	6	6	6	6	6	4	4
20	8	8	8	3	3	3	3
21	5	5	5	5	5	5	5
22	17	14	14	14	14	14	14
23	6	4	5	5	5	5	5
24	8	7	7	4	4	4	4
25	5	4	2	2	2	2	2
26	5	4	0	0	0	0	0
27	10	3	3	3	3	3	2
28	7	6	6	6	6	6	6
29	5	4	4	4	3	2	2
30	69	44	44	35	35	35	35

## Sheet: Mahout
Camp No.	T00	T01	T02	T03	T04	T05	T06
1	40	20	20	20	20	20	18
2	66	28	28	28	28	28	20
3	12	10	10	8	7	5	4
4	66	39	39	39	39	32	25
5	6	4	4	4	4	4	4
6	19	11	6	5	5	5	5
7	3	3	3	2	2	2	2
8	2	1	1	1	1	1	1
9	5	4	4	4	4	4	4
10	60	15	15	10	10	10	10
11	13	7	7	5	5	5	4
12	8	6	4	4	4	4	4
13	8	8	7	7	7	7	7
14	6	4	3	3	3	3	3
15	8	1	1	1	1	1	1
16	3	2	2	NA	NA	NA	NA
17	10	5	2	3	3	3	4
18	5	0	NA	6	6	6	6
19	6	6	3	3	3	3	3
20	9	7	7	7	7	7	7
21	5	3	3	3	3	3	3
22	32	17	12	12	12	12	10
23	5	4	4	2	2	2	3
24	6	6	6	2	2	2	2
25	5	5	2	2	2	2	2
26	2	2	NA	NA	NA	NA	NA
27	9	3	NA	NA	NA	3	2
28	7	6	4	4	4	4	4
29	5	3	3	3	2	2	2
30	60	40	40	30	30	30	30

## Sheet: Ratio of mahout to elephant
Camp No.	T00	T01	T02	T03	T04	T05	T06
1	0.930233	0.444444	0.444444	0.434783	0.37037	0.384615	0.375
2	1.22222	0.528302	0.538462	0.56	0.571429	0.571429	0.434783
3	1	1	1	1	1	0.714286	0.8
4	0.985075	0.58209	0.6	0.619048	0.661017	0.592593	0.625
5	1	0.666667	0.666667	0.666667	0.8	0.8	0.8
6	1	0.647059	0.461538	0.384615	0.384615	0.384615	0.384615
7	1	1	1	0.666667	0.666667	0.666667	0.666667
8	1	0.5	0.5	0.5	0.5	0.5	0.5
9	0.625	0.5	0.5	0.4	0.4	0.4	0.4
10	1.01695	0.263158	0.263158	0.181818	0.181818	0.181818	0.181818
11	1.18182	0.875	0.875	0.625	0.625	0.625	0.5
12	1	0.75	0.5	0.571429	0.571429	0.571429	0.571429
13	0.666667	0.666667	0.7	0.7	0.636364	0.636364	0.636364
14	1	0.666667	0.5	0.5	0.5	0.5	0.5
15	1	1	1	1	1	1	1
16	0.3	0.666667	NA	NA	NA	NA	NA
17	0.833333	0.5	0.222222	0.428571	0.428571	0.428571	0.571429
18	1.25	NA	NA	1	1	1	1
19	1	1	0.5	0.5	0.5	0.75	0.75
20	1.125	0.875	0.875	2.33333	2.33333	2.33333	2.33333
21	1	0.6	0.6	0.6	0.6	0.6	0.6
22	1.88235	1.21429	0.857143	0.857143	0.857143	0.857143	0.714286
23	0.833333	1	0.8	0.4	0.4	0.4	0.6
24	0.75	0.857143	0.857143	0.5	0.5	0.5	0.5
25	1	1.25	1	1	1	1	1
26	0.4	0.5	NA	NA	NA	NA	NA
27	0.9	1	NA	NA	NA	1	1
28	1	1	0.666667	0.666667	0.666667	0.666667	0.666667
29	1	0.75	0.75	0.75	0.666667	1	1
30	0.869565	0.909091	0.909091	0.857143	0.857143	0.857143	0.857143

## Sheet: Staff
Camp No.	T00	T01	T02	T03	T04	T05	T06
1	52	22	22	20	20	20	18
2	110	49	49	45	45	45	45
3	12	8	8	6	6	6	5
4	209	80	80	60	60	50	40
5	9	5	5	4	4	4	3
6	36	20	20	15	15	15	10
7	5	4	4	2	2	2	2
8	8	3	3	2	2	2	2
9	8	7	7	5	5	5	3
10	81	16	16	16	16	16	15
11	13	8	8	6	6	6	5
12	10	8	8	6	6	5	5
13	15	15	15	15	15	15	15
14	11	5	5	4	4	4	3
15	12	9	9	9	9	9	9
16	4	3	NA	NA	NA	NA	NA
17	17	9	9	7	7	7	5
18	10	NA	5	4	4	4	3
19	25	6	6	5	5	5	3
20	36	12	12	10	10	10	8
21	12	9	9	3	3	3	3
22	50	21	21	20	20	20	19
23	10	7	7	5	5	5	3
24	14	9	9	5	5	5	3
25	6	5	5	5	5	5	3
26	14	9	9	7	7	7	5
27	13	4	4	3	3	3	2
28	8	6	6	4	4	4	4
29	5	3	3	2	2	2	2
30	100	70	70	40	40	40	35

## Sheet: Walk distance
Camp No.	T00	T01	T02	T03	T04	T05	T06
1	6	3	3	3	3	3	3
2	10	2	2	1	0.5	2	3
3	6	1	0.5	0.5	0.5	1	1
4	20	4	2	1	1	1	2
5	4	1	2	1	1	1	1
6	4	2	2	0.5	1	2	2
7	3	2	2	2	2	2	3
8	3	2	3	1	1	2	3
9	4	1	1	0.5	1	1	1
10	1	0.6	0.5	0.5	0.5	0.5	0.5
11	3	2	1	1	1	1	2
12	1.5	1	0.5	0.5	0.5	0.5	1
13	7.5	1	0.5	0.5	0.5	1	1
14	1	1	0.5	0.5	0.5	1	1
15	1	0.5	1	1	1	1	1
16	0.6	1	NA	NA	NA	NA	NA
17	2	0.6	0.5	0.5	0.5	0.5	1
18	2	1	NA	1	0.5	1	1
19	5	1.5	0.5	0.5	0.5	0.5	0.5
20	3	1.5	0.5	0.5	0.5	2	2
21	5	2	0.5	0.5	0.5	2	2
22	3	1	0.5	0.5	0.5	1	1
23	4	1	0.5	0.5	1	2	2
24	1	0.3	0.5	0.3	0.3	1	1
25	2	0.5	0.5	0.5	0.5	1	1
26	4	0.5	NA	NA	NA	NA	NA
27	2	0.5	1	0.5	1	1	2
28	3	1	0.5	0.5	1	2	1
29	2	1	0.5	0.5	1	1	2
30	10	1	0.5	0.5	1	1	1

## Sheet: Access to water
Camp No.	T00	T01	T02	T03	T04	T05	T06
1	3	3	3	3	3	3	3
2	3	3	3	1	1	1	1
3	2	3	3	1	1	1	1
4	4	3	2	2	2	2	2
5	3	3	1	1	1	1	1
6	4	3	2	1	1	1	1
7	4	1	1	1	1	1	1
8	4	3	2	1	1	1	1
9	3	3	1	1	1	1	1
10	3	3	1	1	1	1	1
11	4	3	1	1	1	1	1
12	4	3	3	1	1	1	1
13	3	3	2	1	1	1	1
14	2	3	2	1	1	1	1
15	2	2	1	1	1	1	1
16	4	3	2	1	1	1	1
17	3	3	2	2	2	2	2
18	4	3	2	1	1	1	1
19	4	3	1	1	1	1	1
20	3	3	3	1	1	1	1
21	4	3	2	1	1	1	1
22	3	3	2	2	2	2	2
23	3	3	2	2	2	2	2
24	3	3	1	1	1	1	1
25	4	3	2	1	1	1	1
26	3	3	2	1	1	1	1
27	4	3	2	2	1	1	1
28	3	3	1	1	1	1	1
29	3	3	2	2	2	2	2
30	4	3	2	1	1	1	1

## Sheet: Chain time
Camp No.	T00	T01	T02	T03	T04	T05	T06
1	16	22.5	22.5	22.5	22.5	22.5	22.5
2	16	22	24	24	48	48	24
3	16	16	16	24	48	48	24
4	16	23.5	23.5	23.5	23.5	23.5	23.5
5	18	24	24	24	24	24	24
6	15	21	21	21	21	21	21
7	18	20	20	20	20	20	20
8	0	0	0	0	0	0	0
9	16	20	20	24	24	24	24
10	17	16	24	48	48	48	48
11	17	24	48	48	48	24	24
12	15	16	22	22	22	22	22
13	15	15	15	15	15	15	15
14	18	22	24	24	24	24	24
15	15	23.5	24	24	24	24	24
16	19	20	24	NA	NA	NA	NA
17	17	17	24	15	15	15	15
18	16	NA	16	16	16	16	16
19	15	15	15	22	24	24	24
20	14	22	22	22	22	22	22
21	15.5	14	14	24	24	24	24
22	15	22	22	22	22	18	18
23	16	20	20	20	20	20	20
24	19	22	22	22	22	22	22
25	17	17	24	24	24	24	24
26	17	20	NA	NA	NA	NA	NA
27	16	22	48	48	48	24	24
28	19	23.5	23.5	48	48	48	23.5
29	16	14	0	0	0	0	0
30	16	16	20	24	24	20	20

## Sheet: Chain length
Camp No.	T00	T01	T02	T03	T04	T05	T06
1	2	2	2	2	2	2	2
2	3	3	3	3	3	3	3
3	3	3	3	3	3	3	3
4	1.5	1.5	1.5	2.5	2.5	2.5	2.5
5	3	3	3	3	3	3	3
6	3	3	3	3	3	3	3
7	3	3	2	2	2	2	2
8	0	0	0	0	0	0	0
9	5	9	9	9	9	9	9
10	2	2	2	2	3	3	3
11	3	3	3	3	3	3	3
12	3	3	3	3	3	3	3
13	5	5	5	5	5	5	5
14	2	2	10	10	10	10	10
15	3	15	15	15	15	15	15
16	3	3	3	NA	NA	NA	NA
17	5	5	5	5	5	5	5
18	4	NA	4	4	4	4	4
19	5	5	10	10	10	10	10
20	2	2	2	2	2	2	2
21	4	4	4	4	4	4	4
22	12	12	12	10	10	10	10
23	10	10	10	10	10	10	10
24	3	3	3	3	3	3	3
25	5	5	5	5	5	5	5
26	10	10	NA	NA	NA	NA	NA
27	3	12	NA	NA	NA	NA	NA
28	2	15	15	15	15	15	15
29	3	5	5	0	0	0	0
30	3	10	10	10	10	3	3

## Sheet: Roughage
Camp No.	T00	T01	T02	T03	T04	T05	T06
1	200	200	150	200	150	150	150
2	120	120	100	120	120	120	120
3	120	120	120	120	120	120	120
4	180	180	150	150	150	120	120
5	200	200	150	200	150	150	150
6	240	240	200	240	200	200	200
7	300	200	200	200	150	150	150
8	150	150	150	150	150	150	150
9	150	150	150	150	150	150	150
10	300	300	300	200	150	200	150
11	150	100	100	150	90	90	90
12	150	150	150	150	100	150	150
13	250	250	150	100	100	100	150
14	400	400	200	250	200	200	200
15	150	150	150	150	150	150	150
16	350	350	NA	NA	NA	NA	NA
17	180	180	150	180	180	150	180
18	NA	NA	80	90	90	90	90
19	250	250	250	150	150	150	150
20	160	160	160	150	150	150	150
21	200	200	180	200	150	150	150
22	350	350	300	250	200	200	250
23	100	100	100	100	100	100	100
24	200	200	150	150	150	150	150
25	250	250	200	150	200	150	150
26	240	240	240	NA	NA	NA	NA
27	300	300	250	200	200	200	200
28	200	200	200	150	150	150	200
29	150	150	150	150	150	150	150
30	200	200	200	150	150	150	150

[truncated: 2 more sheets: Supplement, Mahout salary]
